# Supplementary material
Source: PubMed Central journal article supplement (PMC2938920)
Supplement: supp_dev.051722_DEV051722TableS1.pdf [file supp_dev.051722_DEV051722TableS1.pdf]

**Table S1. List of genes downregulated in *Pph13* at 72 hours APF**

| Gene                     | GO description                    | Microarray data |                 |
|--------------------------|-----------------------------------|-----------------|-----------------|
|                          |                                   | Fold change     | <i>P</i> -value |
| <b>Phototransduction</b> |                                   |                 |                 |
| <i>Gβ76C</i>             | GTPase activity                   | -3.75           | 0               |
| <i>NinaC</i>             | Protein kinase and motor activity | -3.65           | 0               |
| <i>Arr2</i>              | Metarhodopsin binding             | -2.84           | 0.00002         |
| <i>trp</i>               | Calcium channel activity          | -2.16           | 0.00011         |
| <b>Defense</b>           |                                   |                 |                 |
| <i>TotB</i>              | Stress response                   | -2.5            | 0               |
| <i>CG8889</i>            | Hydrolase activity                | -2.68           | 0               |
| <i>CG31313</i>           | Endopeptidase Inhibitor           | -2.35           | 0.00002         |
| <i>nimB2</i>             | Mesoderm development              | -2.25           | 0.00002         |
| <b>Unknown</b>           |                                   |                 |                 |
| <i>CG5172</i>            | Unknown                           | -2.84           | 0.00001         |
| <i>Osi18</i>             | Unknown                           | -2.45           | 0.00002         |
| <i>PIP82</i>             | Unknown                           | -2.12           | 0.00002         |
| <i>CG10953</i>           | Unknown                           | -2.35           | 0.00038         |
