# Supplementary material
Source: PubMed Central journal article supplement (PMC2938920)
Supplement: supp_dev.051722_DEV051722TableS2.pdf [file supp_dev.051722_DEV051722TableS2.pdf]

**Table S2. List of genes downregulated in *Pph13* at less than 1 day old**

| Gene                                | GO description                     | Microarray data |          |
|-------------------------------------|------------------------------------|-----------------|----------|
|                                     |                                    | Fold change     | P-value  |
| <b>Phototransduction</b>            |                                    |                 |          |
| <i>Rh6</i>                          | Opsin receptor                     | -4.94           | 0.00001  |
| <i>Trpl</i>                         | Calcium channel activity           | -6.51           | 0.00003  |
| <i>Rh2</i>                          | Opsin receptor                     | -5.13           | 3.00E-05 |
| <i>Arr1</i>                         | Metarhodopsin binding              | -3.25           | 7.00E-05 |
| <i>trp</i>                          | Calcium channel activity           | -2.75           | 0.00015  |
| <i>Gβ76C</i>                        | GTPase activity                    | -4.12           | 0.00021  |
| <i>RdgA</i>                         | Diacylglycerol binding             | -2.55           | 0.00452  |
| <b>Defense</b>                      |                                    |                 |          |
| <i>AttC</i>                         | Antibacterial humoral response     | -5.08           | 0.00002  |
| <i>Def</i>                          | Antibacterial humoral response     | -2.03           | 0.00172  |
| <i>Sr-CI</i>                        | Polysaccharide binding             | -2.65           | 0.00028  |
| <b>Structural component</b>         |                                    |                 |          |
| <i>Ank2</i>                         | Cytoskeletal protein binding       | -2.21           | 0.00018  |
| <i>Ccp84Ag</i>                      | Structural constituent of chitin   | -2.31           | 0.00216  |
| <i>Cpr76Bc</i>                      | Structural constituent of chitin   | -2.79           | 0.00413  |
| <b>Enzyme with unknown function</b> |                                    |                 |          |
| <i>CG8889</i>                       | Hydrolase activity                 | -2.64           | 0.00029  |
| <i>CG42366</i>                      | Protein kinase activity            | -2.33           | 0.00055  |
| <i>CG30090</i>                      | Serine-type endopeptidase activity | -3.7            | 0.00328  |
| <b>Other</b>                        |                                    |                 |          |
| <i>CG2650</i>                       | Circadian rhythm                   | -3.56           | 5.00E-05 |
| <i>CG30080</i>                      | Transcription factor activity      | -2.42           | 0.0036   |
| <i>Or65A</i>                        | Odorant receptor                   | -3.1            | 0.00467  |
| <i>CG31700</i>                      | DNA binding activity               | -6.31           | 0.00539  |
| <b>Unknown</b>                      |                                    |                 |          |
| <i>CG12998</i>                      | Unknown                            | -2.22           | 0.00051  |
| <i>CG32494</i>                      | Unknown                            | -3.57           | 0.00224  |
| <i>CG42367</i>                      | Unknown                            | -2.63           | 0.00237  |
| <i>CG42330</i>                      | Unknown                            | -10.75          | 0.00329  |
| <i>CG15282</i>                      | Unknown                            | -2.22           | 0.00499  |
| <i>CG14416</i>                      | Unknown                            | -3.16           | 0.00563  |
| <i>CG32266</i>                      | Unknown                            | -2.69           | 0.00968  |
