# Supplementary material
Source: PubMed Central journal article supplement (PMC2938920)
Supplement: supp_dev.051722_DEV051722TableS3.pdf [file supp_dev.051722_DEV051722TableS3.pdf]

**Table S3. List of genes downregulated in *otd*; *Pph13* at 72 hours APF**

| Gene                                            | GO description                                 | Microarray data |          |
|-------------------------------------------------|------------------------------------------------|-----------------|----------|
|                                                 |                                                | Fold change     | P-value  |
| <b>Phototransduction/rhabdomere development</b> |                                                |                 |          |
| <i>ninaC</i>                                    | Protein kinase and motor activity              | -3.89           | 0        |
| <i>Gβ76C</i>                                    | GTPase activity                                | -3.21           | 0.00016  |
| <i>Arr2</i>                                     | Metarhodopsin binding                          | -2.48           | 0.00038  |
| <i>trp</i>                                      | Calcium channel activity                       | -2.25           | 0.00066  |
| <i>Cpn</i>                                      | Calcium ion binding                            | -2.72           | 0.00095  |
| <i>inaD</i>                                     | Calmodulin binding                             | -2.37           | 0.00106  |
| <b>Phagocytosis, defense</b>                    |                                                |                 |          |
| <i>CG10233</i>                                  | Engulfment of apoptotic cell                   | -3.11           | 4.00E-05 |
| <i>Sr-CI</i>                                    | Polysaccharide binding                         | -2.93           | 0.00058  |
| <i>TotB</i>                                     | Stress response                                | -2.29           | 6.00E-04 |
| <b>Structural component</b>                     |                                                |                 |          |
| <i>Pcp</i>                                      | Structural constituent of chitin               | -3.38           | 8.00E-05 |
| <i>Cpr49Aa</i>                                  | Structural constituent of chitin               | -3.33           | 0.00104  |
| <i>Edg78E</i>                                   | Structural constituent of chitin               | -2.55           | 0.00251  |
| <i>Cpr76Bb</i>                                  | Structural constituent of chitin               | -2.44           | 0.00463  |
| <b>Enzymes with unknown biological process</b>  |                                                |                 |          |
| <i>CG8889</i>                                   | Hydrolase                                      | -2.68           | 0.00021  |
| <i>CG31313</i>                                  | Cysteine-type endopeptidase inhibitor activity | -2.44           | 0.00026  |
| <i>Cpr49Ab</i>                                  | ATP binding/catalytic activity                 |                 |          |
| <i>GstD7</i>                                    | Glutathione transferase activity               | -2.08           | 0.00275  |
| <b>Other</b>                                    |                                                |                 |          |
| <i>CG12120</i>                                  | Visual perception                              | -2.29           | 3.00E-04 |
| <i>CG31839</i>                                  | Mesoderm development                           | -2.69           | 0.00036  |
| <i>MtnA</i>                                     | Metal ion binding                              | -2.22           | 0.00132  |
| <i>CG33225</i>                                  | mRNA splicing                                  | -2.31           | 0.00896  |
| <b>Unknown</b>                                  |                                                |                 |          |
| <i>CG5172</i>                                   | Unknown                                        | -2.64           | 0.00022  |
| <i>Pu</i>                                       | Unknown                                        | -2.61           | 0.00024  |
| <i>CG13721</i>                                  | Unknown                                        | -2.86           | 0.00025  |
| <i>Osi15</i>                                    | Unknown                                        | -2.86           | 0.00027  |
| <i>CG4329</i>                                   | Unknown                                        | -2.15           | 0.00044  |
| <i>CG11786</i>                                  | Unknown                                        | -2.69           | 0.00049  |
| <i>CG4842</i>                                   | Unknown                                        | -2.59           | 0.00049  |
| <i>CG13641</i>                                  | Unknown                                        | -2.25           | 0.00049  |
| <i>Osi9</i>                                     | Unknown                                        | -2.53           | 0.00064  |
| <i>msta</i>                                     | Unknown                                        | -2.88           | 0.00068  |
| <i>CG13647</i>                                  | Unknown                                        | -2.75           | 0.00076  |
| <i>CG30148</i>                                  | Unknown                                        | -2.11           | 0.00104  |
| <i>Osi19</i>                                    | Unknown                                        | -2.54           | 0.00153  |
| <i>CG10953</i>                                  | Unknown                                        | -2.67           | 0.0026   |
| <i>Osi18</i>                                    | Unknown                                        | -2.33           | 0.00495  |
| <i>CG15908</i>                                  | Unknown                                        | -2.53           | 0.00993  |
