# Supplementary material
Source: PubMed Central journal article supplement (PMC2938920)
Supplement: supp_dev.051722_DEV051722TableS4.pdf [file supp_dev.051722_DEV051722TableS4.pdf]

**Table S4. List of genes downregulated in *otd*; *Pph13* at less than 1 day old**

| Gene                                           | GO description                            | Microarray data |          |
|------------------------------------------------|-------------------------------------------|-----------------|----------|
|                                                |                                           | Fold change     | P-value  |
| <b>Phototransduction</b>                       |                                           |                 |          |
| <i>Rh4</i>                                     | Opsin receptor                            | -7.52           | 0        |
| <i>Gβ76C</i>                                   | Gtpase activity                           | -6.27           | 0        |
| <i>Rh2</i>                                     | Opsin receptor                            | -4.2            | 0        |
| <i>ninaC</i>                                   | Protein kinase and motor activity         | -3.7            | 0        |
| <i>Rh6</i>                                     | Opsin receptor                            | -7.59           | 1.00E-05 |
| <i>Arr2</i>                                    | Metarhodopsin binding                     | -3.45           | 1.00E-05 |
| <i>ninaE</i>                                   | Opsin receptor                            | -4.21           | 3.00E-05 |
| <i>Cpn</i>                                     | Calcium ion binding                       | -2.67           | 3.00E-05 |
| <i>trpl</i>                                    | Calcium channel activity                  | -5.56           | 0.00012  |
| <i>chp</i>                                     | Rhabdomere development                    | -3.22           | 0.00017  |
| <i>Gα49B</i>                                   | GTPase activity                           | -4.01           | 0.00031  |
| <i>Rh5</i>                                     | Opsin receptor                            | -3.4            | 0.00031  |
| <i>inaF</i>                                    | Channel regulator activity                | -2.31           | 0.00043  |
| <i>Arr1</i>                                    | Metarhodopsin binding                     | -2.11           | 0.00602  |
| <i>CG31006</i>                                 | Deactivation of rhodopsin signaling       | -3.28           | 0.00872  |
| <i>Rh3*</i>                                    | Opsin receptor                            | -2.69           | 0.03478  |
| <b>Phagocytosis/defense</b>                    |                                           |                 |          |
| <i>CG10233</i>                                 | Engulfment of apoptotic cell              | -3.44           | 1.00E-05 |
| <i>IM4</i>                                     | Defense response                          | -3.47           | 0.00024  |
| <i>CG16791</i>                                 | Phagocytosis, engulfment                  | -2.23           | 0.00089  |
| <i>TotC</i>                                    | Stress response                           | -4.73           | 0.00648  |
| <b>Structural component</b>                    |                                           |                 |          |
| <i>jbug</i>                                    | Actin binding                             | -2.19           | 0.00749  |
| <b>Enzymes with unknown biological process</b> |                                           |                 |          |
| <i>CG8889</i>                                  | Hydrolase                                 | -3.04           | 2.00E-05 |
| <i>CG14786</i>                                 | Oxidoreductase activity                   | -2.2            | 0.00323  |
| <i>CG9391</i>                                  | Inositol-1(or 4)-monophosphatase activity | -2.56           | 0.00339  |
| <i>CG12079</i>                                 | NADH dehydrogenase (ubiquinone) activity  | -2.62           | 0.0039   |
| <i>CG16749</i>                                 | Serine-type endopeptidase activity        | -2.99           | 0.00416  |
| <i>Cyp6a17</i>                                 | Cytochrome P450                           | -2.47           | 0.00492  |
| <i>YL-1</i>                                    | Histone acetyltransferase activity        | -2.52           | 0.00732  |
| <i>CG3902</i>                                  | Electron carrier activity                 | -2.29           | 0.00935  |
| <b>Other</b>                                   |                                           |                 |          |
| <i>Slob</i>                                    | Synaptic transmission                     | -2.83           | 0.00011  |
| <i>Ank2</i>                                    | Axon extension                            | -2.06           | 0.00088  |
| <i>Obp8a</i>                                   | Odorant binding protein                   | -3.86           | 0.00508  |
| <i>plexB</i>                                   | Axon guidance                             | -2.1            | 0.00978  |
| <b>Unknown</b>                                 |                                           |                 |          |
| <i>CG14748</i>                                 | Unknown                                   | -3.45           | 0.00044  |
| <i>msta</i>                                    | Unknown                                   | -2.86           | 0.00045  |
| <i>PIP82</i>                                   | Unknown                                   | -2.07           | 0.00055  |
| <i>CG31036</i>                                 | Unknown                                   | -3.29           | 0.00105  |
| <i>CG12333</i>                                 | Unknown                                   | -3.09           | 0.00125  |
| <i>CG18467</i>                                 | Unknown                                   | -2.27           | 0.00153  |
| <i>CG4000</i>                                  | Unknown                                   | -2.28           | 0.00196  |
| <i>CG6750</i>                                  | Unknown                                   | -2.76           | 0.0024   |
| <i>ncRNA</i>                                   | Unknown                                   | -3.4            | 0.00457  |
| <i>CG7607</i>                                  | Unknown                                   | -2.03           | 0.00467  |
| <i>CG8343</i>                                  | Unknown                                   | -2.08           | 0.00469  |
| <i>CG4660</i>                                  | Unknown                                   | -2.81           | 0.00586  |
| <i>CG31646</i>                                 | Unknown                                   | -2.06           | 0.00761  |
| <i>CG32114</i>                                 | Unknown                                   | -5.26           | 0.00767  |
| <i>CG17202</i>                                 | Unknown                                   | -2.53           | 0.00965  |

\*The expression of *Rh3* shows a downregulation in the double mutant; however, a hybridization defect on one chip in this region resulted in a lower P-value.
