# Supplementary material
Source: PubMed Central journal article supplement (PMC2938920)
Supplement: supp_dev.051722_DEV051722TableS5.pdf [file supp_dev.051722_DEV051722TableS5.pdf]

**Table S5. List of genes upregulated in *Pph13* at 72 hours APF**

| Gene                                           | GO description                                 | Microarray data |                 |
|------------------------------------------------|------------------------------------------------|-----------------|-----------------|
|                                                |                                                | Fold change     | <i>P</i> -value |
| <b>Defense/phagocytosis</b>                    |                                                |                 |                 |
| <i>Def</i>                                     | Antibacterial humoral response                 | 3.13            | 0               |
| <i>CG11652</i>                                 | Phagocytosis, engulfment                       | 2.18            | 0.00095         |
| <i>CecC</i>                                    | Antibacterial humoral response                 | 2.03            | 0.00056         |
| <b>Enzymes with unknown biological process</b> |                                                |                 |                 |
| <i>Cyp28d1</i>                                 | Cytochrome P450                                | 2.9             | 0               |
| <i>gfzf</i>                                    | Glutathione binding                            | 2.19            | 2.00E-05        |
| <i>Cys</i>                                     | Cysteine-type endopeptidase inhibitor activity | 2.18            | 1.00E-04        |
| <b>Other</b>                                   |                                                |                 |                 |
| <i>RpL28</i>                                   | Structural constituent of ribosome             | 3.35            | 0               |
| <i>CG4017</i>                                  | Proteolysis                                    | 2.84            | 0.0014          |
| <b>Unknown</b>                                 |                                                |                 |                 |
| <i>CG12003</i>                                 | Unknown                                        | 2.2             | 4.00E-05        |
