# Supplementary material
Source: PubMed Central journal article supplement (PMC2938920)
Supplement: supp_dev.051722_DEV051722TableS6.pdf [file supp_dev.051722_DEV051722TableS6.pdf]

**Table S6. List of genes upregulated in *Pph13* at less than 1 day old**

| Gene                                           | GO description                                                     | Microarray data |          |
|------------------------------------------------|--------------------------------------------------------------------|-----------------|----------|
|                                                |                                                                    | Fold change     | P-value  |
| <b>Phototransduction</b>                       |                                                                    |                 |          |
| <i>CG11426</i>                                 | Phosphatidate phosphatase activity                                 | 2.39            | 0.00025  |
| <b>Defense/phagocytosis</b>                    |                                                                    |                 |          |
| <i>CG11652</i>                                 | Phagocytosis/engulfment                                            | 3.74            | 0.00172  |
| <i>CG3638</i>                                  | Phagocytosis/engulfment                                            | 3.36            | 0.00295  |
| <i>dro6</i>                                    | Defense response                                                   | 2.23            | 0.00538  |
| <i>mthl6</i>                                   | GPCR                                                               | 4.06            | 0.0091   |
| <b>Enzymes with unknown biological process</b> |                                                                    |                 |          |
| <i>Cys</i>                                     | Cysteine-type endopeptidase inhibitor activity                     | 2.85            | 6.00E-05 |
| <i>GstE3</i>                                   | Glutathione transferase activity                                   | 3.42            | 3.00E-05 |
| <i>α-Est7</i>                                  | Carboxylesterase activity                                          | 2.51            | 0.00024  |
| <i>Cyp6a23</i>                                 | Cytochrome P450                                                    | 2.06            | 0.00043  |
| <i>CG7742</i>                                  | Rab GTPase activator activity                                      | 2.61            | 0.00061  |
| <i>GstE5</i>                                   | Glutathione transferase activity                                   | 2.05            | 0.00227  |
| <b>Cytoskeletal</b>                            |                                                                    |                 |          |
| <i>Acp65Aa</i>                                 | Structural constituent of chitin                                   | 2.78            | 6.00E-05 |
| <i>Tektin-C</i>                                | Microtubule binding                                                | 3.08            | 0.00048  |
| <b>Transport</b>                               |                                                                    |                 |          |
| <i>Lsp2</i>                                    | Nutrient reservoir activity                                        | 2.42            | 0.00157  |
| <i>CG7091</i>                                  | High affinity inorganic phosphate:sodium symporter activity        | 3.15            | 0.00319  |
| <i>CG7333</i>                                  | Secondary active organic cation transmembrane transporter activity | 2.13            | 0.00577  |
| <b>Metabolism</b>                              |                                                                    |                 |          |
| <i>Amy-d</i>                                   | Alpha-amylase activity                                             | 2.17            | 0.00408  |
| <i>Cyp6a9</i>                                  | Cytochrome P450                                                    | 2.2             | 0.00512  |
| <i>CG8757</i>                                  | Oxidoreductase activity                                            | 2.48            | 0.00725  |
| <b>Other</b>                                   |                                                                    |                 |          |
| <i>Takr99D</i>                                 | Tachykinin receptor signaling pathway                              | 2               | 0.00033  |
| <i>RpL28</i>                                   | Structural constituent of ribosome                                 | 3.57            | 0.00226  |
| <i>lectin-28C</i>                              | Galactose binding                                                  | 2.07            | 0.00447  |
| <i>CG13340</i>                                 | Aminopeptidase activity                                            | 2.21            | 0.00945  |
| <b>Unknown</b>                                 |                                                                    |                 |          |
| <i>CG16898</i>                                 | Unknown                                                            | 2.85            | 0.00022  |
| <i>CG13737</i>                                 | Unknown                                                            | 2               | 0.00058  |
| <i>CG32368</i>                                 | Unknown                                                            | 2.06            | 0.00147  |
| <i>CG3934</i>                                  | Unknown                                                            | 3.43            | 0.00249  |
| <i>CG7126</i>                                  | Unknown                                                            | 2.8             | 0.00787  |
| <i>CG32115</i>                                 | Unknown                                                            | 6.72            | 0.00843  |
| <i>CG31223</i>                                 | Unknown                                                            | 2.57            | 0.00859  |
| <i>CG32945</i>                                 | Unknown                                                            | 2.94            | 0.00916  |
