# Supplementary material
Source: PubMed Central journal article supplement (PMC2938920)
Supplement: supp_dev.051722_DEV051722TableS7.pdf [file supp_dev.051722_DEV051722TableS7.pdf]

**Table S7. List of genes upregulated in *otd*; *Pph13* at 72 hours APF**

| Gene                                          | GO description                     | Microarray data |          |
|-----------------------------------------------|------------------------------------|-----------------|----------|
|                                               |                                    | Fold change     | P-value  |
| <b>Defense</b>                                |                                    |                 |          |
| <i>IM2</i>                                    | Defense response                   | 4.09            | 0        |
| <i>IM1</i>                                    | Defense response                   | 3.89            | 2.00E-05 |
| <i>CecB</i>                                   | Antibacterial humoral response     | 2.75            | 6.00E-05 |
| <i>CecC</i>                                   | Antibacterial humoral response     | 3.07            | 7.00E-05 |
| <i>CecA2</i>                                  | Antibacterial humoral response     | 2.97            | 1.00E-04 |
| <i>CG3638</i>                                 | Phagocytosis/engulfment            | 2.69            | 1.00E-04 |
| <i>IM3</i>                                    | Antibacterial humoral response     | 3.56            | 0.00081  |
| <i>Def</i>                                    | Antibacterial humoral response     | 2.6             | 0.00091  |
| <i>IM4</i>                                    | Defense response                   | 2.11            | 0.00246  |
| <b>Enzyme with unknown biological process</b> |                                    |                 |          |
| <i>Cyp28d1</i>                                | Cytochrome P450                    | 3.46            | 2.00E-05 |
| <i>gfzf</i>                                   | Glutathione binding                | 3.17            | 0.00013  |
| <i>GstE6</i>                                  | Glutathione transferase activity   | 2.94            | 0.00013  |
| <i>CG16733</i>                                | Aryl sulfotransferase activity     | 2.16            | 0.00421  |
| <i>CG3355</i>                                 | Serine-type endopeptidase activity | 2.3             | 0.0032   |
| <b>Cytoskeletal</b>                           |                                    |                 |          |
| <i>Lcp65Ag1</i>                               | Structural constituent of chitin   | 2.36            | 0.00038  |
| <i>Lcp65Ad</i>                                | Structural constituent of chitin   | 2.85            | 0.00083  |
| <i>Lcp65Ag2</i>                               | Structural constituent of chitin   | 2.1             | 0.00083  |
| <i>CG1259</i>                                 | Structural constituent of chitin   | 2.49            | 0.00214  |
| <i>Ccp84Ab</i>                                | Structural constituent of chitin   | 2.69            | 0.00241  |
| <i>Cpr50Ca</i>                                | Structural constituent of chitin   | 2.59            | 0.00415  |
| <i>CG8634</i>                                 | Structural constituent of chitin   | 2.83            | 0.00621  |
| <i>Edg84A</i>                                 | Structural constituent of chitin   | 2.08            | 0.00767  |
| <b>Other</b>                                  |                                    |                 |          |
| <i>CG30375</i>                                | Proteolysis                        | 7.25            | 0.00011  |
| <i>RpL28</i>                                  | Structural constituent of ribosome | 4.05            | 0.00018  |
| <i>CG4770</i>                                 | Catalytic activity                 | 2.47            | 0.00079  |
| <i>CG2177</i>                                 | Metal ion transporter activity     | 2.52            | 0.00318  |
| <i>Cyp6a8</i>                                 | Cytochrome P450                    | 2.06            | 0.00347  |
| <i>Caf1</i>                                   | Chromatin silencing                | 2.3             | 0.00528  |
| <b>Unknown</b>                                |                                    |                 |          |
| <i>CG16836</i>                                | Unknown                            | 2.79            | 6.00E-05 |
| <i>CG10200</i>                                | Unknown                            | 3.17            | 0.00023  |
| <i>CG11370</i>                                | Unknown                            | 2.74            | 0.00025  |
| <i>CG15213</i>                                | Unknown                            | 2.35            | 0.00033  |
| <i>Osi12</i>                                  | Unknown                            | 2.43            | 0.00038  |
| <i>CG15065</i>                                | Unknown                            | 2.35            | 0.00112  |
| <i>CG11852</i>                                | Unknown                            | 2.39            | 0.00258  |
| <i>CG12003</i>                                | Unknown                            | 3.34            | 0.00291  |
| <i>CG15675</i>                                | Unknown                            | 2.06            | 0.00302  |
| <i>CG3709</i>                                 | Unknown                            | 2.2             | 0.00354  |
| <i>CG11413</i>                                | Unknown                            | 2.31            | 0.0057   |
| <i>CG33299</i>                                | Unknown                            | 2.26            | 0.00654  |
| <i>CG7516</i>                                 | Unknown                            | 3.6             | 0.00735  |
