# Supplementary material
Source: PubMed Central journal article supplement (PMC2938920)
Supplement: supp_dev.051722_DEV051722TableS8.pdf [file supp_dev.051722_DEV051722TableS8.pdf]

**Table S8. List of genes upregulated in *otd*; *Pph13* at less than 1 day old**

| Gene                                           | GO description                       | Microarray data |                 |
|------------------------------------------------|--------------------------------------|-----------------|-----------------|
|                                                |                                      | Fold change     | <i>P</i> -value |
| <b>Defense</b>                                 |                                      |                 |                 |
| <i>CG13422</i>                                 | Defense to Gram negative bacteria    | 2.1             | 0.00011         |
| <i>CG11652</i>                                 | Phagocytosis/engulfment              | 2.53            | 0.00034         |
| <i>CecA2</i>                                   | Antibacterial humoral response       | 3.42            | 0.00108         |
| <i>CG3638</i>                                  | Phagocytosis/engulfment              | 2.43            | 0.00144         |
| <i>Mtk</i>                                     | Antibacterial humoral response       | 2.34            | 0.00404         |
| <b>Cytoskeletal</b>                            |                                      |                 |                 |
| <i>Ccp84Ab</i>                                 | Structural constituent of chitin     | 4.27            | 0.00113         |
| <i>Cpr50Cb</i>                                 | Structural constituent of chitin     | 2.27            | 0.00533         |
| <i>Cpr49Ac</i>                                 | Structural constituent of chitin     | 2.49            | 0.00604         |
| <b>Enzyme with unknown biological function</b> |                                      |                 |                 |
| <i>GstE3</i>                                   | Glutathione transferase activity     | 3.01            | 0.00049         |
| <i>CG15369</i>                                 | Cystine-type endopeptidase activity  | 2.06            | 0.00223         |
| <i>CG31689</i>                                 | ATPase activity coupled to transport | 2.04            | 0.0096          |
| <b>Other</b>                                   |                                      |                 |                 |
| <i>Arc1</i>                                    | Nucleic acid binding                 | 2.85            | 0.00039         |
| <i>Yp3</i>                                     | Embryonic development                | 2.81            | 8.00E-04        |
| <i>lectin-28C</i>                              | Galactose binding                    | 2.09            | 0.00187         |
| <i>CG2177</i>                                  | Metal ion transporter activity       | 2.51            | 0.00773         |
| <b>Unknown</b>                                 |                                      |                 |                 |
| <i>CG5172</i>                                  | Unknown                              | 2.05            | 2.00E-04        |
| <i>TwdlW</i>                                   | Unknown                              | 2.05            | 0.00089         |
| <i>CG2685</i>                                  | Unknown                              | 2.01            | 0.00149         |
| <i>CG15887</i>                                 | Unknown                              | 2.38            | 0.00152         |
| <i>lcs</i>                                     | Unknown                              | 2.55            | 0.00184         |
| <i>CG16898</i>                                 | Unknown                              | 3.33            | 0.00357         |
| <i>CG16820</i>                                 | Unknown                              | 2.05            | 0.00424         |
| <i>CG11300</i>                                 | Unknown                              | 3.05            | 0.0046          |
| <i>CG5697</i>                                  | Unknown                              | 2.94            | 0.00581         |
| <i>Neurochondrin</i>                           | Unknown                              | 2.57            | 0.00866         |
| <i>fit</i>                                     | Unknown                              | 2.43            | 0.0091          |
