# Supplementary material
Source: PubMed Central journal article supplement (PMC2938920)
Supplement: supp_dev.051722_DEV051722TableS9.pdf [file supp_dev.051722_DEV051722TableS9.pdf]

**Table S9. Primers used for PCR amplification**

| Gene           | Forward primer (5'-3') | Reverse primer (5'-3') |
|----------------|------------------------|------------------------|
| <i>Gapdh</i>   | CAAGAACGCTGACATCCTGA   | CAGAAGTCACAAACGCCTCA   |
| <i>Act5C</i>   | GTGCCCATCTACGAGGGTTA   | ACATCTGCTGGAAGGTGGAC   |
| <i>Gβ76C</i>   | TATCGCTGGCTTATCGCTTT   | ACAGGCTGATGCAAGTGATG   |
| <i>CG8889</i>  | CTACATGGCCCAGTCCAGTT   | AAGTCGCTGATGATGGCTCT   |
| <i>TotB</i>    | CGCACTGCTACTGATTGGAA   | TGCACCGAGTTCGGTAAAG    |
| <i>ninaC</i>   | CTCGCTCCAGGACTTTGTC    | TTTGCTGATAGTTGCGTTGC   |
| <i>CG5172</i>  | GTGGTGGTGGTGGTCAGAG    | CAAGGACTTGCTTGCATGG    |
| <i>Arr2</i>    | CCAAGAAGTCCGTGAAGAGC   | GGCGAAGTCCTCGAATACAA   |
| <i>Osi18</i>   | GTCGAATCCGCTTACTCAGG   | TAACCAAGGCTCCAGACAGC   |
| <i>CG31313</i> | GCAGTCCGTGAAAGTGATCTT  | GCCTGTCCCAGATCTTTACG   |
| <i>nimB2</i>   | AGCGAAATCCGCACATCTAC   | CCTGCAGATGCAGAAGTTTG   |
| <i>PIP82</i>   | TCGGATTGGTTCCTCTATGG   | GCACCAACGACTGGAATTTT   |
| <i>trp</i>     | GGAGGAAGATCATCGAGCAG   | CTTGCTAGCTTCGGTCTTGG   |
| <i>CG10953</i> | ATTCCTGGTTGTTGCCTTTG   | GGGGGAATGTAGGTGTTCACT  |
| <i>Rh6</i>     | CAAGGACTGGTGGAACAGGT   | CATGGCATCTTCTCCCGTAG   |
| <i>Rh2</i>     | TGAGGATTGCGACAAAAGTG   | CCGTATTGCCAAACACACAC   |
| <i>Rh3</i>     | TCTGACATCCTGCACCTTTG   | GTGGTCTGCTGTGGTTCCTG   |
| <i>Rh4</i>     | GGAACCCCAATTGTCGTCTA   | CCCCGATCAGCGACATTAC    |
| <i>Rh5</i>     | GAAATGGACTGGTCATCTGGA  | GAGACGAAGGGCGTGATTAG   |
| <i>Rh1</i>     | CTGGGCAAGATTGCCTACAT   | CCCCAAATGGTATTCAAGTGG  |
